# Supplementary material
Source: PubMed Central journal article supplement (PMC4249321)
Supplement: IAI.01701-14_zii999090932so1.pdf [file IAI.01701-14_zii999090932so1.pdf]

**Table S1.** Cytotoxicity of isogenic *eae+*/*stx+* and *eae+*/*stx-* *E. coli* O145:H28/NM strain pairs to Vero and T24 cell lines

| Strain  | Serotype | <i>fliC</i> | <i>stx</i>                     | ST | Stx titer |     |
|---------|----------|-------------|--------------------------------|----|-----------|-----|
|         |          |             |                                |    | Vero      | T24 |
| 5122/99 | O145:NM  | H28         | <i>stx2a</i>                   | 32 | 32        | 16  |
| 488/99  | O145:NM  | H28         | -                              | 32 | -         | -   |
| 1695/00 | O145:NM  | H28         | <i>stx2a</i>                   | 32 | 64        | 32  |
| 72/99   | O145:NM  | H28         | -                              | 32 | -         | -   |
| EDL933  | O157:H7  | H7          | <i>stx1a</i> ,<br><i>stx2a</i> | 11 | 64        | 32  |

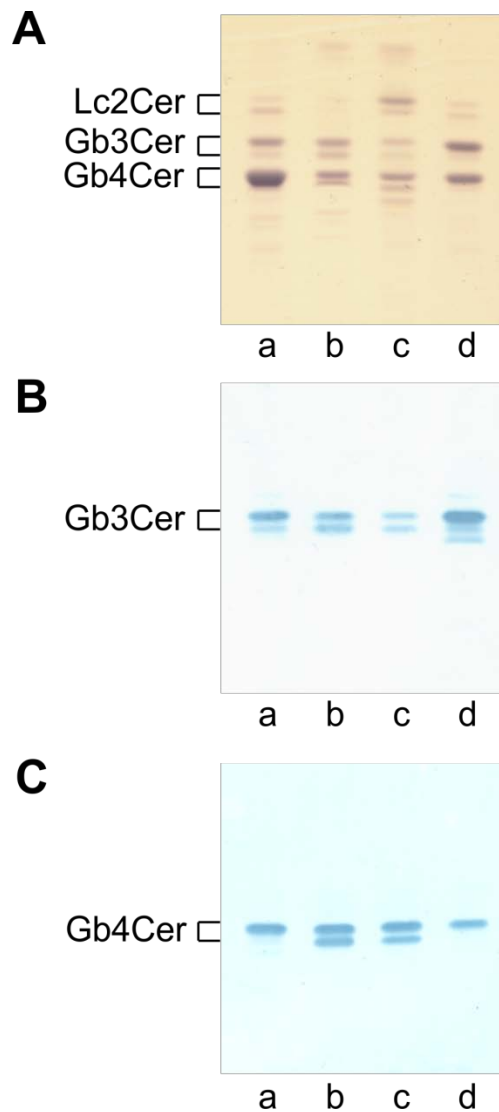

**Figure S1.** Orcinol stain (A) and antibody-mediated detection of Gb3Cer (B) and Gb4Cer (C) in the neutral GSL preparations from Vero and T24 cells. GSL amounts of Vero cells (A-C, lanes b) and T24 cells (A-C, lanes c) are equivalent to  $1 \times 10^6$  cells for the orcinol stain (A, lanes b, c) and  $1 \times 10^5$  cells for the antibody assays (B and C, lanes b, c). Neutral GSL reference mixture 1 containing Gb4Cer as principal component and lower quantities of Gb3Cer corresponds to 10  $\mu\text{g}$  (A, lane a), 1  $\mu\text{g}$  (B, lane a), and 0.1  $\mu\text{g}$  (C, lane a). Neutral GSL reference mixture 2 comprising equimolar amounts of Gb3Cer and Gb4Cer equates 5  $\mu\text{g}$  (A, lane d), 0.5  $\mu\text{g}$  (B, lane d) and 0.05  $\mu\text{g}$  (C, lane d).

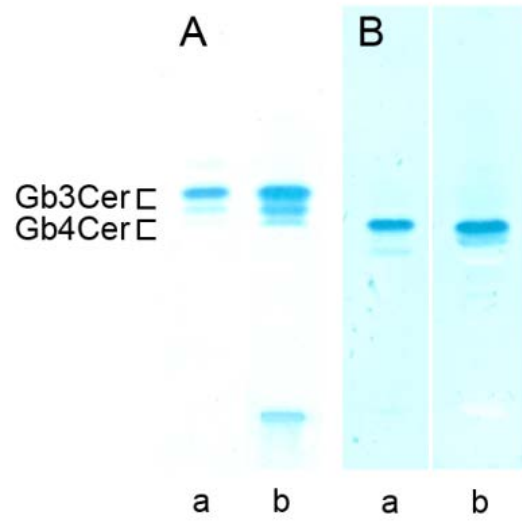

**Figure S2.** Antibody-mediated detection of Gb3Cer (A) and Gb4Cer (B) in the neutral GSL preparation of mouse C57BL/6 bladders. GSL amounts of bladder (A and B, lane b each) are equivalent to 3 mg of wet weight tissue. Neutral GSL reference mixture 1 corresponds to 1  $\mu\text{g}$  (A, lane a) and 0.1  $\mu\text{g}$  (B, lane a).

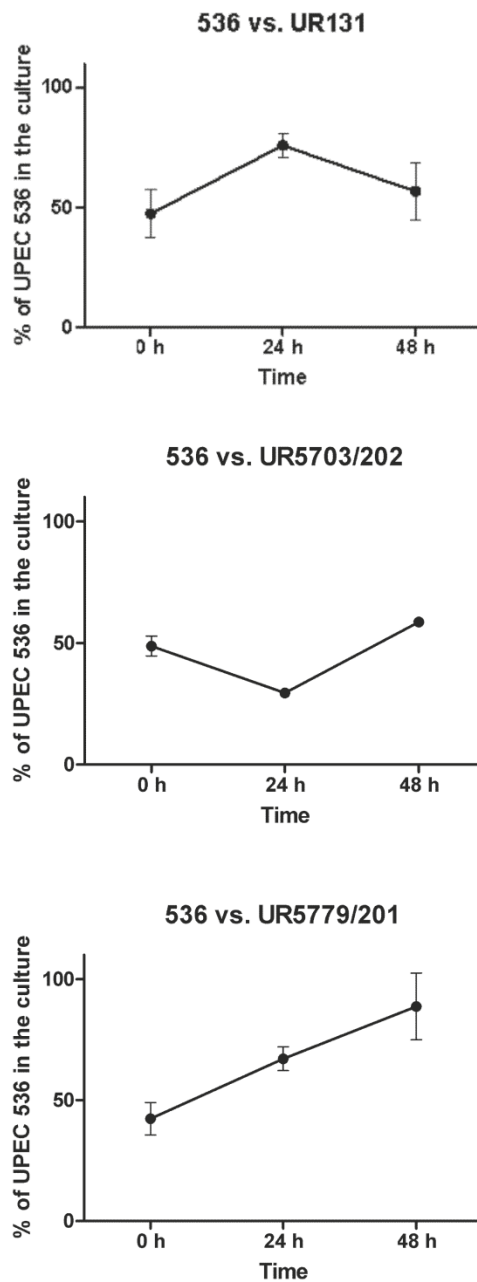

**Figure S3.** Competitiveness of aUPEC isolates relative to archetypal UPEC strain 536 in pooled human urine. The cultures were inoculated in a 1:1 ratio with one aUPEC strain (streptomycin-sensitive) and with archetypal UPEC isolate 536 (streptomycin-resistant) and then incubated under static conditions at 37 °C for 24 h. The next day, a fresh urine culture was inoculated with the 24-h culture starting with an  $OD_{600} = 0.02$ . The ratio of the atypical UPEC strain and archetypal UPEC strain 536 in the 24-h culture and the 48-h subculture was calculated after determination of the cfu count on LB agar and on streptomycin selective LB agar, respectively. The values represent the means and standard deviations of at least three independent experiments.
